# Supplementary material for: Genomics and Virulence of Klebsiella pneumoniae Kpnu95 ST1412 Harboring a Novel Incf Plasmid Encoding Blactx-M-15 and Qnrs1 Causing Community Urinary Tract Infection
Source: MDPI journal article supplement (doi:10.3390/microorganisms9051022), 2021-05-10
Supplement: s1 [file s1]

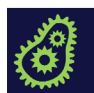

Supplementary

# Genomics and Virulence of *Klebsiella Pneumoniae* Kpnu95 ST1412 Harboring a Novel Incf Plasmid Encoding *Bl*<sub>CTX-M-15</sub> and *Qnrs1* Causing Community Urinary Tract Infection

Ayala Gancz <sup>1</sup>, Kira Kondratyeva <sup>1</sup>, Dorit Cohen-Eli <sup>1</sup> and Shiri Navon-Venezia <sup>1,2,\*</sup>

<sup>1</sup> Molecular Biology Department, Faculty of Life Sciences, Ariel University, Ariel 40700, Israel; ayalagancz@gmail.com (A.G.); lutra007@gmail.com (K.K.); dorit553@gmail.com (D.C.-E.)

<sup>2</sup> The Miriam and Sheldon Adelson School of Medicine, Ariel University, Ariel 40700, Israel

\* Correspondence: shirinv@ariel.ac.il

**Citation:** Gancz, A.; Kondratyeva, K.; Cohen-Eli, D.; Navon-Venezia, S. Genomics and Virulence of *Klebsiella Pneumoniae* Kpnu95 ST1412 Harboring a Novel Incf Plasmid Encoding *Bl*<sub>CTX-M-15</sub> and *Qnrs1* Causing Community Urinary Tract Infection. *Microorganisms* **2021**, *9*, 1022. <https://doi.org/10.3390/microorganisms9051022>

Academic Editor: Jane Turton

Received: 7 April 2021

Accepted: 4 May 2021

Published: 10 May 2021

**Publisher's Note:** MDPI stays neutral with regard to jurisdictional claims in published maps and institutional affiliations.

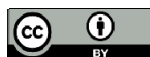

**Copyright:** © 2021 by the authors. Licensee MDPI, Basel, Switzerland. This article is an open access article distributed under the terms and conditions of the Creative Commons Attribution (CC BY) license (<http://creativecommons.org/licenses/by/4.0/>).

## 1. Supplementary Materials

**Table S1.** Average generation times of KpnU95, the cured, and the plasmid reconstituted cured strain

| <i>K. pneumoniae</i><br>isolate                          | Average generation time $\pm$ SD (min) in different media |                  |                    |
|----------------------------------------------------------|-----------------------------------------------------------|------------------|--------------------|
|                                                          | LB                                                        | BM2              | Artificial urine   |
| KpnU95 (Clinical)                                        | 42.21 $\pm$ 0.50                                          | 73.45 $\pm$ 2.01 | 95.37 $\pm$ 2.09   |
| KpnU95 $\Delta$ pKpnU95 (Cured)                          | 41.82 $\pm$ 0.88                                          | 73.64 $\pm$ 2.22 | 103.85 $\pm$ 2.68* |
| KpnU95 $\Delta$ pKpnU95/pKpnU95<br>(Cured reconstituted) | 40.94 $\pm$ 1.69                                          | 73.44 $\pm$ 1.06 | 89.99 $\pm$ 7.50   |

\* Significantly long generation time of KpnU95 $\Delta$ pKpnU95 versus KpnU95 clinical strain ( $p$  value = 0.0361) using Student's t-test.

**Table S2.** Average generation times of KpnU95, the cured, and the plasmid reconstituted cured strain in the presence of copper

| <i>K. pneumoniae</i><br>isolate                          | Average generation time $\pm$ SD (minutes) in different<br>CuSO <sub>4</sub> concentration [mM], $p$ value |                    |                    |                  |
|----------------------------------------------------------|------------------------------------------------------------------------------------------------------------|--------------------|--------------------|------------------|
|                                                          | 0                                                                                                          | 2                  | 4                  | 8                |
| KpnU95 (Clinical)                                        | 51.93 $\pm$ 0.005                                                                                          | 50.53 $\pm$ 0.48   | 54.56 $\pm$ 1.35   | 78.85 $\pm$ 3.87 |
| KpnU95 $\Delta$ pKpnU95 (Cured)                          | 52.14 $\pm$ 4.12                                                                                           | 57.41 $\pm$ 0.35** | 63.33 $\pm$ 1.18*  | 86.29 $\pm$ 2.77 |
| KpnU95 $\Delta$ pKpnU95/pKpnU95<br>(Cured reconstituted) | 51.93 $\pm$ 0.03                                                                                           | 52.46 $\pm$ 0.18   | 62.59 $\pm$ 0.002* | 76.25 $\pm$ 0.34 |

\*  $p \leq 0.05$  and \*\*  $p \leq 0.005$  versus KpnU95 with Student's t-test.

**Table S3.** PCR primers to screen the presence of pKpnU95 accessory unique genes encoded on pU95.

| Primer                                     | Sequence (5' – 3')                                        | Target                             | Am-<br>plicon<br>Size<br>(bp) | Reference  |
|--------------------------------------------|-----------------------------------------------------------|------------------------------------|-------------------------------|------------|
| CTX-M1-F<br>CTX-M1-R                       | AAAAATCACTGCGCCAGTTC<br>AGCTTATTCATCGCCACGTT              | <i>bla</i> <sub>CTX-M-group1</sub> | 415                           | [1]        |
| umuD_pU95_F<br>umuD_pU95_R                 | ATGTTCTTAATTCCAATGGAAAATCC<br>TTACAGATTACCCCGGGCA         | <i>umuD</i>                        | 423                           | This study |
| IncF(K)_pU95_F<br>IncFIB(K)+partRep_pU95_R | GATCATTCGCTCGATGTCTG<br>CCCGCTGATGAGTTTGGGAT              | <i>IncFIB(K)</i>                   | 571                           | This study |
| qnrS1_pU95_F<br>qnrS1_pU95_R               | ATGGAAACCTACAATCATACATAT CG<br>TTAGTCAGGATAAACAACAATACCCA | <i>qnrS1</i>                       | 657                           | This study |
| HisP_pU95_F<br>HisP_pU95_R                 | ATGCGTGATTATGCTATTGAG<br>TCATGCTGACTCCTTCAATGC            | <i>hisP</i>                        | 819                           | This study |
| chrA_pU95_F<br>chrA_pU95_R                 | ATGAACGATACTGCCAGGA<br>TCACAGTGCTAAACTCAACAAC             | <i>chrA</i>                        | 1206                          | This study |
| pcoB_pU95_F<br>pcoB_pU95_R                 | ATGCTGTTGAAAACGTCTCG<br>TCATTCCTCCACCCGGACTT              | <i>pcoB</i>                        | 1818                          | This study |

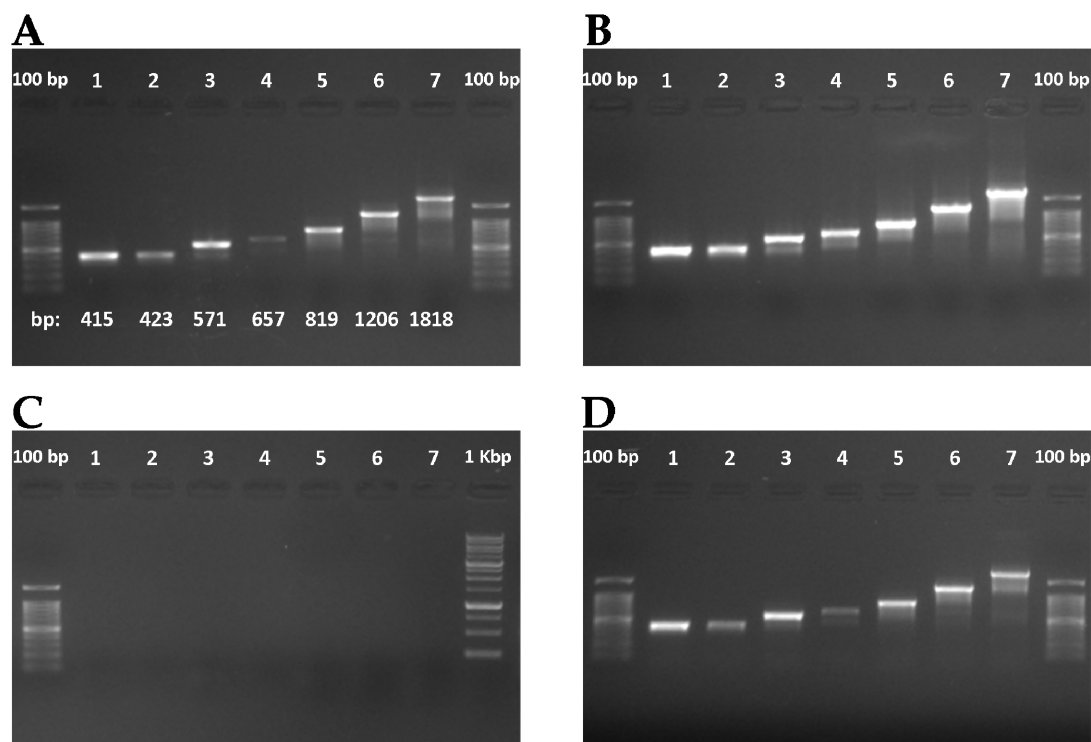

**Figure S1.** Targeted PCR screening for validating the presence/absence of pKpnU95 plasmid in the different studied strains. The PCR amplified seven genes encoded on pKpnU95. The expected amplicons are presented in the clinical KpnU95 strain (amplicon sizes appear in base pairs, bp) (A); PCR performed on the purified plasmid pKpnU95 (B); lysate of the cured strain KpnΔpKpnU95 (C), and from the reconstituted strain KpnU95-cured/pKpnU95 (D). The seven pKpnU95 amplified genes in panels A–D are: lane 1 - *bla*<sub>CTX-M-group1</sub>; lane 2 - *umuD*; lane 3 - *IncFIB(K)*; lane 4 - *qnrS1*; lane 5 - *hisP*; lane 6 - *chrA*; lane 7 - *pcoB*. The DNA molecular weight markers are 1kb and 100bp ladders (GeneDirex). Electrophoresis was performed in 1% agarose.

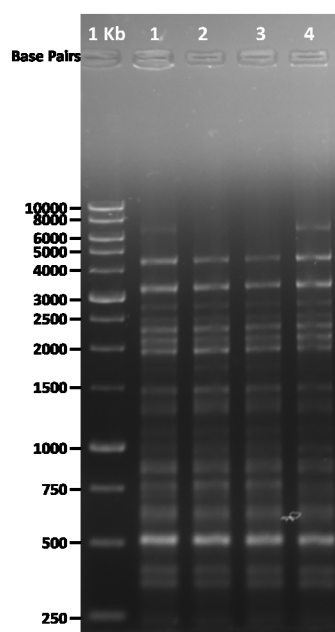

**Figure 2.** ERIC-PCR analysis of KpnU95 strains. ERIC-PCR pattern of crude DNA lysates of KpnU95, lane 1; KpnU95 after passages at 42°C as a control, lane 2; KpnΔpKpnU95, lane 3, and KpnΔpKpnU95/pKpnU95, lane 4. The DNA molecular weight marker is a 1kb ladder (Bio-Labs). Electrophoresis was performed in 1% agarose gel.

## References

1. Woodford, N.; Fagan, E.J.; Ellington, M.J. Multiplex PCR for rapid detection of genes encoding CTX-M extended-spectrum  $\beta$ -lactamases. *J. Antimicrob. Chemother.* **2006**, *57*, 154–155.
